# Supplementary material for: Molecular underpinnings of exceptional response in primary malignant melanoma of the esophagus to anti-PD-1 monotherapy
Source: HighWire-hosted journal article supplement (doi:10.1136/jitc-2022-005937), 2023-01-01
Supplement: jitc-2022-005937supp002_data_supplement.xls [file jitc-2022-005937supp002_data_supplement.xls]

## Sheet: Supplemental Table 1
Supplemental Table 1. Patient characteristics of samples for molecular underpinning analysis
Patient ID	LDH	Stage	Location	Genomics	Transcriptome	mIHC
1	205	IV	Nasal	No	Yes	No
2	153	I/II	Esophageal	Yes	No	No
3	162	I/II	Genital	Yes	No	Yes
4	190	III	Esophageal	Yes	Yes	No
5	163	III	Esophageal	Yes	No	Yes
6	145	III	Esophageal	Yes	No	Yes
7	140	III	Genital	Yes	No	No
8	179	III	Esophageal	Yes	No	Yes
9	128	II	Esophageal	Yes	No	Yes
10	184	II	Esophageal	Yes	No	Yes
11	152	II	Nasal	No	Yes	No
12	161	I/II	Nasal	Yes	No	Yes
13	203	II	Genital	Yes	No	Yes
14	119	II	Oral	No	Yes	Yes
15	281	I/II	Nasal	Yes	No	Yes
16	229	I/II	Nasal	Yes	No	Yes
17	156	I/II	Oral	Yes	No	Yes
18	479	I/II	Genital	Yes	No	No
19	133	I/II	Genital	Yes	No	Yes
20	206	II	Genital	Yes	No	No
21	191	II	Nasal	Yes	No	Yes
22	156	III	Oral	Yes	Yes	No
23	351	I	Nasal	Yes	No	No
24	198	II	Nasal	Yes	No	No
25	161	I	Esophageal	Yes	Yes	No
26	125	II	Esophageal	Yes	Yes	Yes
27	405	I/II	Anorectal	Yes	No	No
28	183	I	Esophageal	Yes	Yes	No
29	208	I/II	Nasal	Yes	No	No
30	167	IV	Genital	Yes	No	No
31	169	IV	Genital	No	Yes	No
32	142	IV	Esophageal	Yes	Yes	Yes
33	173	II	Genital	No	Yes	No
34	177	I	Nasal	No	Yes	No
35	143	II	Genital	No	Yes	Yes
36	194	III	Anorectal	No	Yes	Yes
37	NA	I	Anorectal	Yes	No	Yes
38	190	I/II	Anorectal	Yes	No	No
39	194	III	Oral	No	Yes	Yes
40	194	IV	Anorectal	Yes	No	No
41	206	I	Nasal	No	Yes	No
42	277	IV	Esophageal	Yes	No	Yes
43	NA	III	Esophageal	Yes	Yes	No
44	237	III	Oral	No	Yes	No
45	150	I	Esophageal	Yes	Yes	Yes
46	175	IV	Nasal	No	Yes	No
47	NA	II	Oral	No	Yes	No
48	256	IV	Esophageal	Yes	Yes	Yes
49	215	II	Anorectal	No	Yes	No
50	218	IV	Anorectal	No	Yes	Yes
51	193	IV	Anorectal	No	Yes	No
52	NA	IV	Nasal	No	Yes	Yes
53	132	III	Oral	No	Yes	No
54	NA	III	Nasal	No	Yes	No
55	114	III	Esophageal	Yes	Yes	Yes
56	173	III	Oral	No	Yes	No
57	179	I	Esophageal	Yes	Yes	Yes
58	178	IV	Genital	No	Yes	No
59	162	III	Esophageal	Yes	No	No
60	190	IV	Esophageal	Yes	No	Yes
61	162	IV	Esophageal	Yes	No	Yes
62	138	III	Esophageal	Yes	No	No
63	136	IV	Oral	Yes	Yes	No
64	212	IV	Oral	Yes	No	Yes
65	187	I/II	Genital	Yes	No	Yes
66	NA	III	Oral	No	Yes	No
67	177	II	Esophageal	No	No	Yes
68	170	III	Esophageal	No	No	Yes
